# Supplementary material for: Evaluation of the New York State Mesonet Profiler Network data
Source: Copernicus journal article supplement (doi:10.5194/amt-15-6011-2022), 2022-10-20
Supplement: Supplementary file 1 [file amt-15-6011-2022-supplement.pdf]

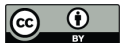

*Supplement of*

## **Evaluation of the New York State Mesonet Profiler Network data**

**Bhupal Shrestha et al.**

*Correspondence to:* Bhupal Shrestha (bshrestha@albany.edu)

The copyright of individual parts of the supplement might differ from the article licence.

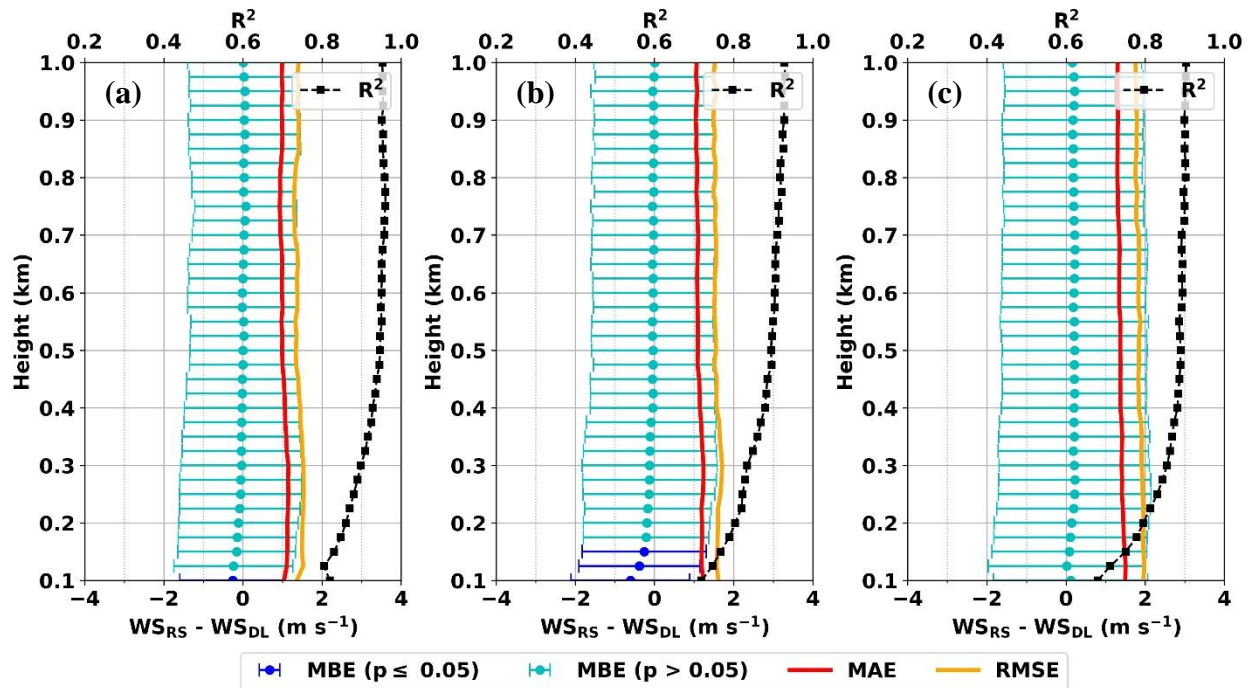

Figure S1: Vertical profiles of  $R^2$ , MBE with one standard deviation error bars, MAE and RMSE for horizontal wind speed (WS) at three NYSM Profiler Network sites at: (a) Buffalo, (b) Albany, and (c) Stony Brook.

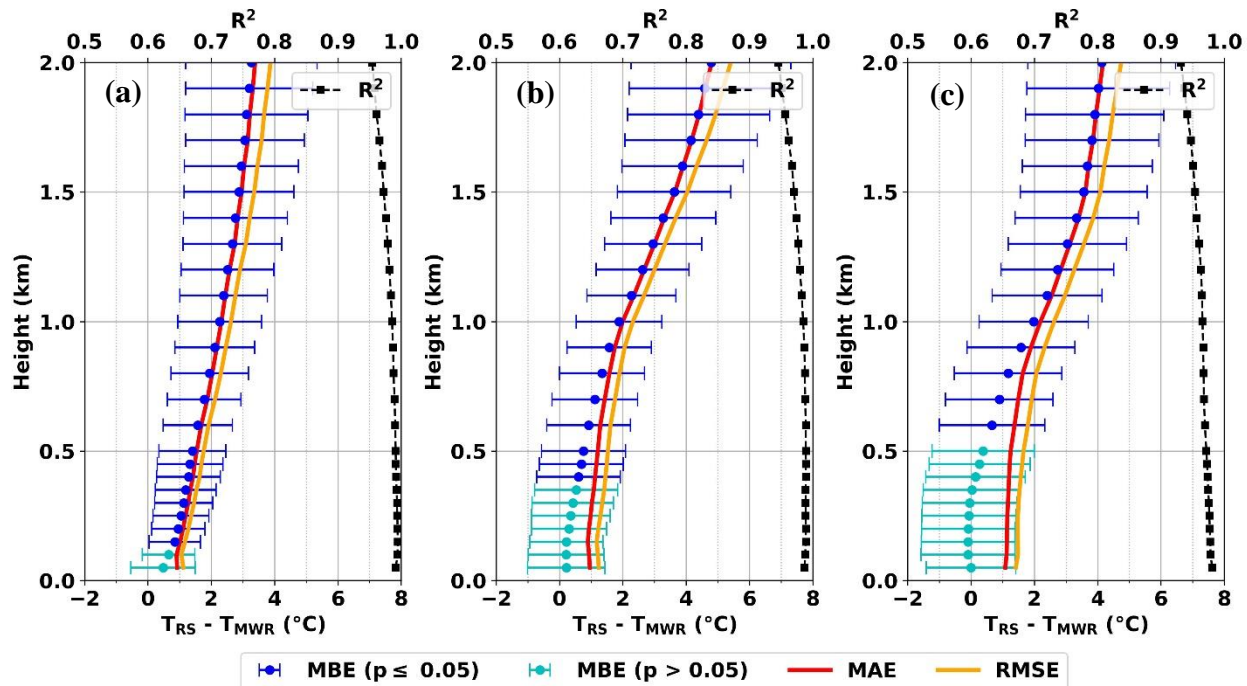

Figure S2: Vertical profiles of  $R^2$ , MBE with one standard deviation error bars, MAE and RMSE for temperature ( $T$ ) at three NYSM Profiler Sites at: (a) Buffalo, (b) Albany, and (c) Stony Brook.

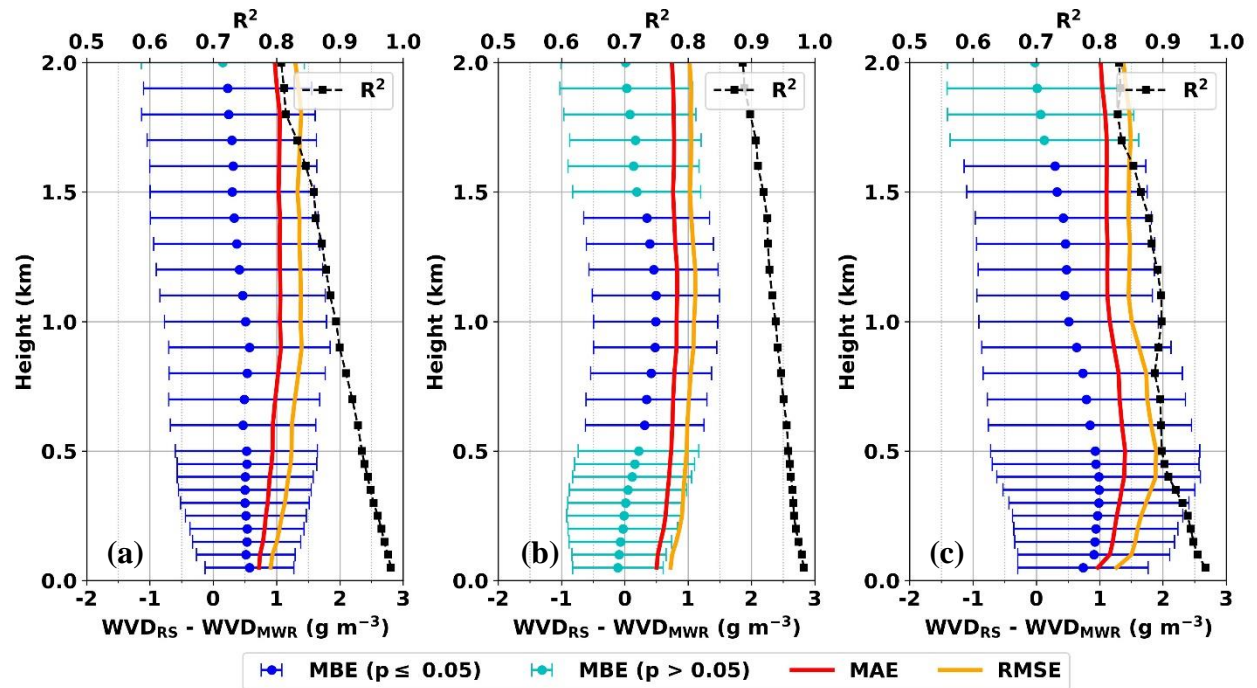

Figure S3: Vertical profiles of  $R^2$ , MBE with one standard deviation error bars, MAE and RMSE for water vapor density (WVD) at three NYSM Profiler Sites at: (a) Buffalo, (b) Albany, and (c) Stony Brook.

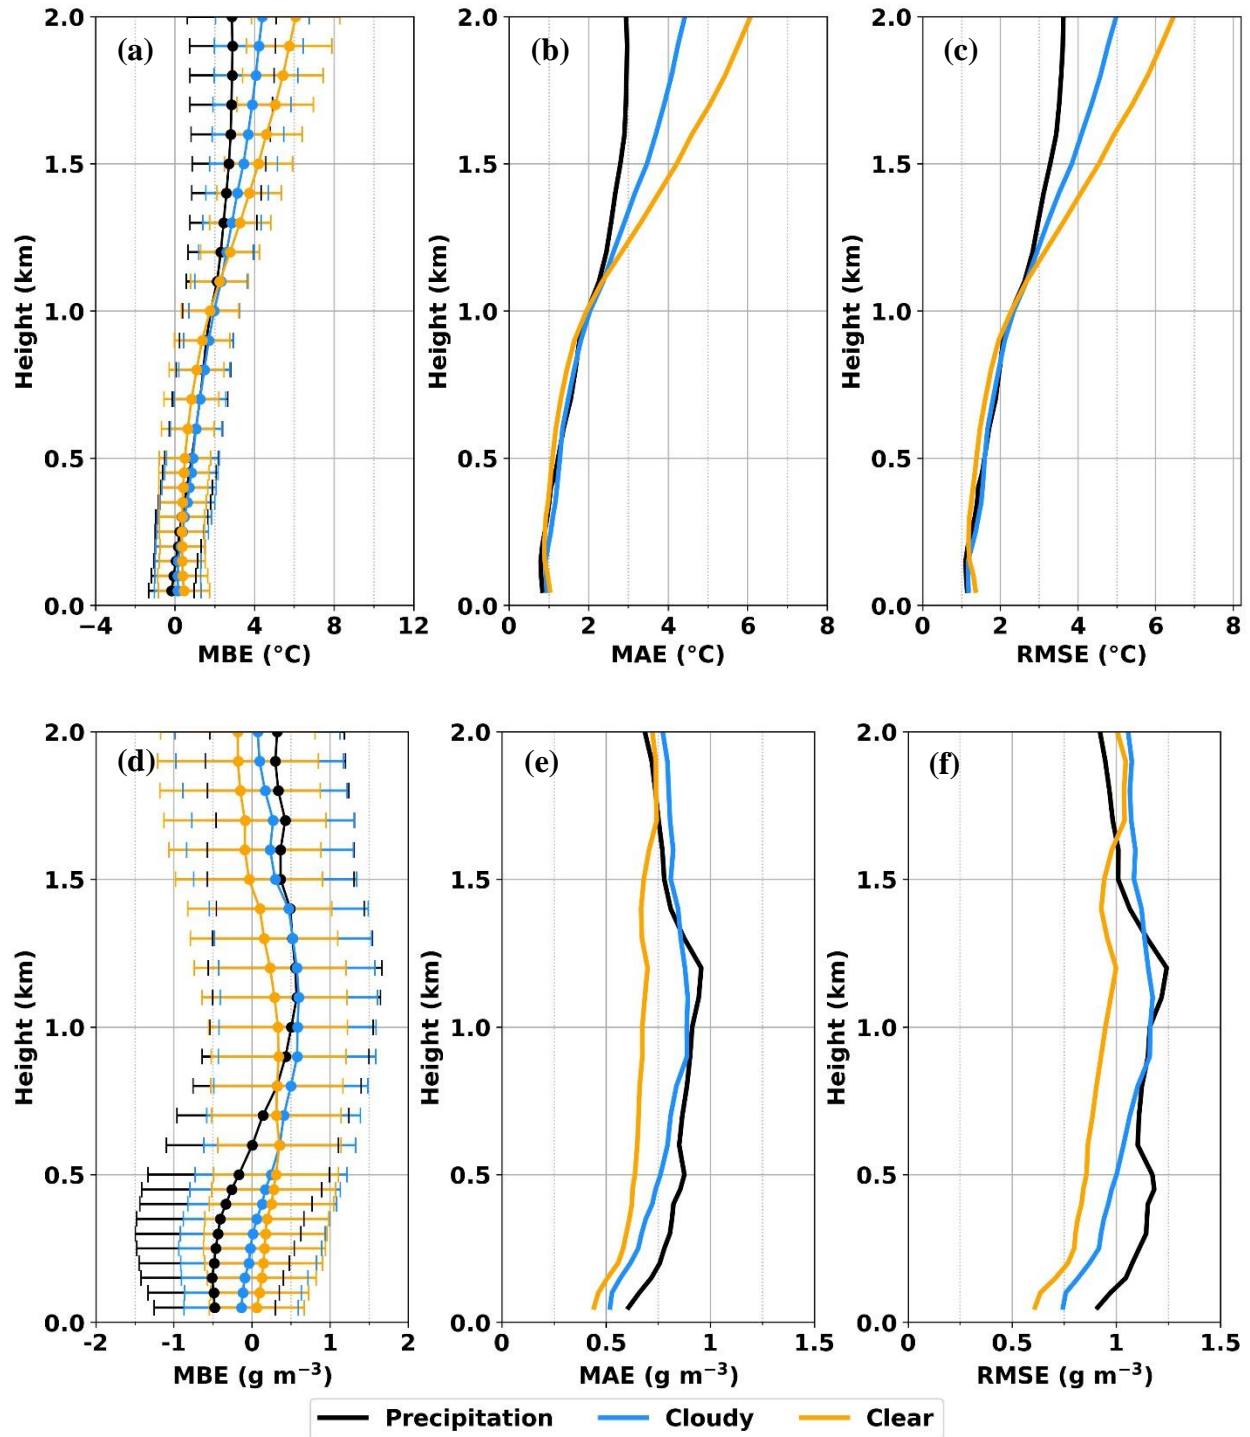

Figure S4: Vertical profiles of MBE with one standard deviation error bars, MAE and RMSE for (a – c) temperature and (d – f) water vapor density during three weather conditions from the NYSM Profiler site at Albany.
